# Supplementary material
Source: PubMed Central journal article supplement (PMC4540924)
Supplement: JCM.01317-15_zjm999094476so1.pdf [file JCM.01317-15_zjm999094476so1.pdf]

SUPPLEMENTAL TABLE 1. FilmArray® BioThreat Panel and qRT-PCR testing results for whole blood, plasma and urine from patients with EVD.<sup>a,b</sup>

| Specimen        |                 | Result              |                 |              |          |    |
|-----------------|-----------------|---------------------|-----------------|--------------|----------|----|
| FilmArray®      | qRT-PCR         | FilmArray®          | NP2 qRT-PCR     | CT           |          |    |
| Whole blood     | Whole blood     | Detected            | Positive        | 20           |          |    |
|                 |                 | Detected            | Positive        | 21           |          |    |
|                 |                 | Detected            | Positive        | 22           |          |    |
|                 |                 | Detected            | Positive        | 23           |          |    |
|                 |                 | Detected            | Positive        | 24           |          |    |
|                 |                 | Detected            | Positive        | 35           |          |    |
|                 |                 | Detected            | Positive        | 35           |          |    |
|                 |                 | Detected            | Positive        | 36           |          |    |
|                 |                 | Detected            | Positive        | 36           |          |    |
|                 |                 | Detected            | Positive        | 36           |          |    |
|                 |                 | Detected            | Positive        | 36           |          |    |
|                 |                 | Detected            | Positive        | 36           |          |    |
|                 |                 | Detected            | Positive        | 36           |          |    |
|                 |                 | Detected            | Positive        | 36           |          |    |
|                 |                 | Detected            | Positive        | 37           |          |    |
|                 |                 | Detected            | Positive        | 37           |          |    |
|                 |                 | Detected            | Positive        | 37           |          |    |
|                 |                 | Detected            | Positive        | 37           |          |    |
|                 |                 | Detected            | Positive        | 37           |          |    |
|                 |                 | Detected            | Positive        | 37           |          |    |
|                 |                 | Detected            | Positive        | 37           |          |    |
|                 |                 | <b>Not Detected</b> | <b>Positive</b> | 38           |          |    |
|                 |                 | Detected            | Positive        | 39           |          |    |
|                 |                 | <b>Not Detected</b> | <b>Positive</b> | 39           |          |    |
|                 |                 | <b>Not Detected</b> | <b>Positive</b> | 39           |          |    |
|                 |                 | Detected            | Positive        | 40           |          |    |
|                 |                 | <b>Detected</b>     | <b>Negative</b> | NA           |          |    |
|                 |                 | Not Detected        | Negative        | NA           |          |    |
|                 |                 | Not Detected        | Negative        | NA           |          |    |
|                 |                 | Not Detected        | Negative        | NA           |          |    |
|                 |                 | Not Detected        | Negative        | NA           |          |    |
|                 |                 | Whole blood         | Plasma          | Detected     | Positive | 23 |
|                 |                 |                     |                 | Detected     | Positive | 26 |
| Detected        | Positive        |                     |                 | 27           |          |    |
| Detected        | Positive        |                     |                 | 28           |          |    |
| Detected        | Positive        |                     |                 | 31           |          |    |
| Detected        | Positive        |                     |                 | 32           |          |    |
| Detected        | Positive        |                     |                 | 36           |          |    |
| Detected        | Positive        |                     |                 | 37           |          |    |
| Detected        | Positive        |                     |                 | 38           |          |    |
| Detected        | Positive        |                     |                 | 38           |          |    |
| Detected        | Positive        |                     |                 | 39           |          |    |
| Detected        | Positive        |                     |                 | 39           |          |    |
| Detected        | Positive        |                     |                 | 39           |          |    |
| <b>Detected</b> | <b>Negative</b> |                     |                 | NA           |          |    |
| <b>Detected</b> | <b>Negative</b> |                     |                 | NA           |          |    |
| Not Detected    | Negative        |                     |                 | NA           |          |    |
| Not Detected    | Negative        |                     |                 | NA           |          |    |
| Not Detected    | Negative        |                     |                 | NA           |          |    |
| Not Detected    | Negative        |                     |                 | NA           |          |    |
| Urine           | Urine           |                     |                 | Not Detected | Negative | NA |
|                 |                 | Detected            | Positive        | 29           |          |    |

|                     |                 |           |
|---------------------|-----------------|-----------|
| Detected            | Positive        | 30        |
| Detected            | Positive        | 34        |
| Detected            | Positive        | 35        |
| Detected            | Positive        | 37        |
| Detected            | Positive        | 38        |
| Detected            | Positive        | 38        |
| <b>Not Detected</b> | <b>Positive</b> | <b>39</b> |
| Detected            | Positive        | 39        |
| <b>Detected</b>     | <b>Negative</b> | NA        |
| Not Detected        | Negative        | NA        |
| Not Detected        | Negative        | NA        |
| Not Detected        | Negative        | NA        |

---

Abbreviation: NA, not applicable

<sup>a</sup>Testing was performed using both the FilmArray® BioThreat panel and the CDC real-time reverse transcriptase polymerase chain reaction (qRT-PCR) assay.

<sup>b</sup>Discrepancies in bold.
